# Supplementary material for: The Great Recession, unemployment and suicide
Source: PubMed Central journal article supplement — J Epidemiol Community Health. 2014 Oct 23;69(2):110–6. doi: 10.1136/jech-2014-204602 (PMC4316842; doi:10.1136/jech-2014-204602), 2014-10-23
Supplement: jech-2014-204602-s1.pdf [file jech-2014-204602-s1.pdf]

Webappendix

Table A1. Estimated effects (elasticities) of unemployment and Uncrisis on male suicide rate (65+ years). Estimates from fixed-effects models, and pooled estimates from country-specific ARIMA-models.

| Country group                      | N    | Fixed-effects estimates |       |       |                     |       |       | Pooled ARIMA-estimates |       |       |                     |                     |       |       |                     |
|------------------------------------|------|-------------------------|-------|-------|---------------------|-------|-------|------------------------|-------|-------|---------------------|---------------------|-------|-------|---------------------|
|                                    |      | Unemployment            |       |       | Uncrisis            |       |       | Unemployment           |       |       |                     | Uncrisis            |       |       |                     |
|                                    |      | Est                     | SE    | P     | Est                 | SE    | P     | Est                    | SE    | P     | <i>F-test</i> #     | Est                 | SE    | P     | <i>F-test</i> #     |
| 1. Eastern European countries      | 210  | 0.041                   | 0.037 | 0.266 | 0.054               | 0.107 | 0.615 | 0.057                  | 0.046 | 0.218 | 0.203 <sup>NS</sup> | -0.093              | 0.166 | 0.574 | 0.007 <sup>NS</sup> |
| 2. Southern European countries     | 153  | 0.023                   | 0.052 | 0.663 | 0.011               | 0.054 | 0.838 | -0.008                 | 0.049 | 0.875 | 0.616 <sup>NS</sup> | 0.058               | 0.082 | 0.481 | 0.052 <sup>NS</sup> |
| 3. Anglo-Saxon countries           | 250  | -0.018                  | 0.057 | 0.751 | 0.038               | 0.301 | 0.900 | 0.004                  | 0.027 | 0.896 | 0.384 <sup>NS</sup> | -0.102              | 0.172 | 0.553 | 0.067 <sup>NS</sup> |
| 4. Bismarckian                     | 303  | -0.021                  | 0.015 | 0.154 | -0.057              | 0.072 | 0.423 | -0.001                 | 0.016 | 0.973 | 0.466 <sup>NS</sup> | 0.056               | 0.111 | 0.613 | 0.048 <sup>NS</sup> |
| 5. Scandinavian countries          | 204  | 0.042                   | 0.037 | 0.262 | -0.367              | 0.161 | 0.023 | -0.040                 | 0.027 | 0.144 | 0.913 <sup>NS</sup> | -0.094              | 0.357 | 0.793 | 0.050 <sup>NS</sup> |
| <i>F-test for heterogeneity</i> \$ |      | 0.537 <sup>NS</sup>     |       |       | 1.117 <sup>NS</sup> |       |       | 0.979 <sup>NS</sup>    |       |       |                     | 0.174 <sup>NS</sup> |       |       |                     |
| All countries                      | 1120 | 0.002                   | 0.013 | 0.862 | -0.041              | 0.052 | 0.429 |                        |       |       |                     |                     |       |       |                     |

\$ *F-test for heterogeneity of estimates between country groups*

# *F-test for heterogeneity of estimates within country groups*

NS  $P \geq 0.05$

Table A2. Estimated effects (elasticities) of unemployment and Uncrisis on female suicide rate (65+ years). Estimates from fixed-effects models, and pooled estimates from country-specific ARIMA-models.

| Country group                      | N    | Fixed-effects estimates |       |       |                     |       |       | Pooled ARIMA-estimates |       |       |                     |                     |       |       |                     |
|------------------------------------|------|-------------------------|-------|-------|---------------------|-------|-------|------------------------|-------|-------|---------------------|---------------------|-------|-------|---------------------|
|                                    |      | Unemployment            |       |       | Uncrisis            |       |       | Unemployment           |       |       |                     | Uncrisis            |       |       |                     |
|                                    |      | Est                     | SE    | P     | Est                 | SE    | P     | Est                    | SE    | P     | <i>F-test</i> #     | Est                 | SE    | P     | <i>F-test</i> #     |
| 1. Eastern European countries      | 210  | 0.021                   | 0.046 | 0.641 | -0.006              | 0.178 | 0.973 | 0.013                  | 0.074 | 0.862 | 0.449 <sup>NS</sup> | -0.193              | 0.208 | 0.355 | 0.055 <sup>NS</sup> |
| 2. Southern European countries     | 153  | 0.122                   | 0.081 | 0.133 | 0.014               | 0.093 | 0.881 | 0.038                  | 0.071 | 0.598 | 6.638 <sup>NS</sup> | 0.154               | 0.109 | 0.160 | 0.171 <sup>NS</sup> |
| 3. Anglo-Saxon countries           | 250  | 0.169                   | 0.104 | 0.104 | 0.078               | 0.547 | 0.886 | 0.043                  | 0.045 | 0.341 | 0.920 <sup>NS</sup> | -0.103              | 0.417 | 0.806 | 0.024 <sup>NS</sup> |
| 4. Bismarckian                     | 303  | 0.000                   | 0.024 | 0.988 | 0.040               | 0.104 | 0.703 | 0.009                  | 0.027 | 0.749 | 0.281 <sup>NS</sup> | 0.147               | 0.118 | 0.214 | 0.173 <sup>NS</sup> |
| 5. Scandinavian countries          | 204  | -0.030                  | 0.046 | 0.516 | 0.083               | 0.217 | 0.700 | -0.031                 | 0.054 | 0.572 | 1.150 <sup>NS</sup> | 0.066               | 0.333 | 0.842 | 0.001 <sup>NS</sup> |
| <i>F-test for heterogeneity</i> \$ |      | 1.623 <sup>NS</sup>     |       |       | 0.019 <sup>NS</sup> |       |       | 0.265 <sup>NS</sup>    |       |       |                     | 0.341 <sup>NS</sup> |       |       |                     |
| All countries                      | 1120 | 0.020                   | 0.024 | 0.422 | 0.052               | 0.094 | 0.584 |                        |       |       |                     |                     |       |       |                     |

\$ *F-test for heterogeneity of estimates between country groups*

# *F-test for heterogeneity of estimates within country groups*

NS  $P \geq 0.05$

Table A3. Estimated effects (elasticities) of unemployment on male and female suicide rate (20-64 years). Estimates from fixed-effects models controlling for Uncrisis and GDP/capita.

| Country group                                 | N    | Fixed-effects estimates controlling for GDP |       |        |                     |       |       |
|-----------------------------------------------|------|---------------------------------------------|-------|--------|---------------------|-------|-------|
|                                               |      | Males                                       |       |        | Females             |       |       |
|                                               |      | Est                                         | SE    | P      | Est                 | SE    | P     |
| 1. Eastern European countries                 | 207  | 0.093                                       | 0.029 | 0.002  | 0.113               | 0.051 | 0.029 |
| 2. Southern European countries                | 153  | 0.132                                       | 0.071 | 0.065  | 0.019               | 0.114 | 0.868 |
| 3. Anglo-Saxon countries                      | 250  | 0.106                                       | 0.042 | 0.010  | 0.139               | 0.077 | 0.071 |
| 4. Bismarckian                                | 303  | 0.034                                       | 0.010 | 0.001  | 0.009               | 0.016 | 0.570 |
| 5. Scandinavian countries                     | 204  | 0.037                                       | 0.025 | 0.132  | 0.041               | 0.038 | 0.279 |
| <i>F-test for heterogeneity</i> <sup>\$</sup> |      | 1.108 <sup>NS</sup>                         |       |        | 0.875 <sup>NS</sup> |       |       |
| All countries                                 | 1120 | 0.046                                       | 0.011 | <0.001 | 0.035               | 0.018 | 0.049 |

<sup>\$</sup> *F-test for heterogeneity of estimates between country groups*

NS P≥0.05
